# Supplementary material for: Tracing temporal and geographic distribution of resistance to pyrethroids in the arboviral vector Aedes albopictus
Source: PLoS Negl Trop Dis. 2020 Jun 22;14(6):e0008350. doi: 10.1371/journal.pntd.0008350 (PMC7332087; doi:10.1371/journal.pntd.0008350)
Supplement: S1 Table — Haplotypes identified at Domain I (A), Domain II (B) and Domain III (C) (XLSX) [file pntd.0008350.s001.xlsx]

## Sheet: A-Domain 1
Supplemental Table 1. Haplotypes identified at Domain I (A), Domain II (B) and Domain III (C
A
													Haplotype
	CG	TU	TS	FR	MC	GA	IA	IT	IF	IO	IM	IC	Non Syn Mut	410
N.inds	39	21	28	22	183	28	27	27	36	18	30	17
N.Haplotype	78	42	56	44	366	56	54	54	72	36	60	34
H01	39	21	17	22	180	28	26	27	27	18	30	16		V410
H02	1	0	3	0	3	2	4	0	0	2	1	0	F397I	V410
H03	6	1	0	2	10	0	0	2	1	3	3	1	L409F	V410
H04	2	9	0	2	15	0	0	1	3	6	10	0	F397I, L409F	V410
H05	0	0	0	0	0	1	0	0	0	2	0	0		V410
H06	0	0	0	0	0	0	2	0	0	0	0	0		V410A
H07	0	0	7	0	0	0	0	0	0	0	0	3	S389X stop codon	V410
H08	0	1	0	0	1	0	0	0	0	0	0	1		V410L
H09	0	0	1	0	0	0	0	0	0	0	1	3	L396H, I402N, F403L	V410
H10	0	0	0	0	0	0	0	0	0	0	0	2	L396H, I402H, I413L	V410G
H11	0	1	0	0	0	0	0	0	0	0	0	1	I402L	V410
H12	0	0	0	0	10	0	0	0	0	0	0	0	A418S	V410
H13	0	0	0	0	5	0	0	0	0	0	0	0	F397I, L409F, A418S	V410
H14	0	0	0	0	3	0	0	0	0	0	0	0	A389V, A418S	V410
H15	0	0	0	0	2	0	0	0	0	0	0	0	F397I	V410
H16	0	0	0	0	2	0	0	0	0	0	0	0		V410
H17	0	0	3	0	0	0	0	0	0	0	0	0	L396H, F397L, I402N, F403L	V410
H18	0	0	6	0	0	0	0	0	0	0	0	0	A389D	V410
H19	0	0	4	0	0	0	0	0	0	0	0	0	L396H	V410
	48	33	41	26	231	31	32	30	31	31	45	27

## Sheet: B-Domain 2
													Haplotype*
	CG	TU	TS	FR	MC	GA	IA	IT	IF	IO	IM	IC	Non Syn Mut	989	1011	1016
N.inds	39	21	28	22	183	28	27	27	36	18	30	17
N.Haplotype	78	42	56	44	366	56	54	54	72	36	60	34
H01	29	3	4	8	49	4	4	1	4	6	7	5		S989	I1011	V1016
H02	2	0	0	0	0	0	3	0	0	0	0	0	N1065H	S989	I1011	V1016
H03	2	0	1	0	0	0	1	1	0	0	0	2	N1065H	S989	I1011	V1016
H04	4	0	0	0	0	1	6	0	0	0	0	0		S989	I1011	V1016
H05	6	1	3	5	1	0	0	0	2	0	0	0		S989	I1011	V1016
H06	3	0	0	0	0	0	0	0	0	0	0	0	L1017P	S989	I1011	V1016
H07	4	25	13	4	30	9	1	1	3	2	1	4		S989	I1011	V1016
H08	1	0	0	0	0	0	0	0	0	0	0	0	S1061F	S989	I1011	V1016G
H09	2	3	2	8	71	1	3	5	2	2	5	8		S989	I1011	V1016
H10	1	0	0	1	0	0	0	0	1	0	2	0		S989	I1011	V1016G
H11	2	3	1	1	0	0	0	0	0	0	0	0		S989	I1011	V1016
H12	1	0	1	1	2	0	0	0	0	0	0	1		S989	I1011	V1016
H13	0	4	3	3	21	2	4	4	4	1	2	3		S989	I1011	V1016
H14	0	0	2	3	0	0	0	0	0	0	0	0		S989	I1011	V1016
H15	0	1	0	3	0	0	1	0	0	0	0	0		S989	I1011	V1016
H16	0	0	0	1	2	0	1	0	1	2	5	1		S989	I1011	V1016
H17	0	0	0	0	0	3	0	0	0	0	0	0		S989	I1011	V1016
H18	0	0	0	0	0	5	0	0	0	0	0	0		S989	I1011	V1016
H19	0	0	0	0	0	1	1	1	0	0	0	0	V1010M	S989	I1011	V1016
H20	0	0	0	0	5	1	0	0	1	0	0	0		S989	I1011	V1016
H21	0	0	0	0	0	4	0	0	0	0	0	0		S989	I1011	V1016
H22	0	0	0	0	12	1	0	0	0	0	0	0		S989	I1011	V1016
H23	0	1	0	0	0	1	0	0	0	0	0	0	E988K	S989	I1011	V1016
H24	0	2	1	0	0	1	0	0	0	0	0	0		S989	I1011	V1016
H25	0	0	0	0	0	0	5	0	0	0	0	0	V1010M	S989	I1011	V1016
H26	0	0	0	0	0	0	4	0	0	0	0	0	N1065H	S989	I1011	V1016
H27	0	0	0	0	3	0	1	0	0	1	0	0		S989	I1011	V1016
H28	0	0	0	0	0	0	2	2	0	0	0	0	V1009G, V1010M	S989	I1011	V1016
H29	0	0	0	0	0	0	3	0	0	0	0	0	N1065H	S989	I1011	V1016
H30	0	0	1	0	0	0	6	0	0	0	0	0		S989	I1011	V1016
H31	0	0	0	0	0	0	7	0	0	0	0	0	V1010M	S989	I1011	V1016
H32	0	0	0	0	5	0	2	1	0	2	0	0		S989	I1011	V1016
H33	0	0	0	0	2	0	3	1	0	2	0	1		S989	I1011	V1016
H34	0	0	0	0	0	0	2	0	0	0	0	0	V1010M, N1065H	S989	I1011	V1016
H35	0	0	0	0	2	0	1	1	0	1	0	0		S989	I1011	V1016
H36	0	0	0	0	0	0	0	0	0	0	0	1	S1030P	S989	I1011	V1016I
H37	0	0	0	0	0	0	0	0	1	0	0	3		S989	I1011	V1016
H38	0	0	0	0	0	0	0	0	2	2	0	1		S989	I1011	V1016
H39	0	0	0	0	3	0	0	0	0	0	0	1		S989	I1011	V1016
H40	0	0	0	0	0	0	0	0	0	0	0	4	N1065H	S989	I1011	V1016
H41	0	0	0	0	2	0	0	0	1	0	0	1		S989	I1011	V1016
H42	0	0	0	0	2	0	0	0	0	0	0	3		S989	I1011	V1016
H43	0	0	0	0	3	0	0	0	2	0	0	0		S989	I1011	V1016
H44	0	0	0	0	14	0	0	0	6	9	2	0		S989	I1011	V1016
H45	0	0	0	0	0	0	0	1	3	0	0	0		S989	I1011	V1016
H46	0	0	0	0	1	0	0	0	1	0	1	0	E988K	S989	I1011	V1016
H47	0	0	0	0	2	0	0	0	1	0	0	0		S989	I1011	V1016
H48	0	0	0	0	0	0	0	0	3	0	0	0		S989	I1011	V1016
H49	0	0	1	0	17	0	0	0	6	6	2	0		S989	I1011	V1016
H50	0	0	0	0	0	0	0	0	1	1	0	0	W986R, E988K, V999M, P1003L, V1009P	S989	I1011	V1016
H51	0	0	0	0	0	0	0	0	1	1	0	0	D992E, C993S	S989	I1011	V1016
H52	0	0	0	0	0	0	0	0	2	2	2	0		S989	I1011	V1016
H53	0	0	0	0	0	0	0	1	1	1	0	0		S989	I1011	V1016
H54	0	0	0	0	4	0	0	0	0	0	1	0		S989	I1011	V1016
H55	0	0	0	0	0	0	0	0	0	0	1	0	W991G, C993W, L995V	S989	I1011V	V1016
H56	0	0	0	0	0	0	0	0	0	1	0	0	E988Stop, D992E	S989Y	I1011	V1016
H57	0	0	0	0	2	0	0	0	0	2	0	0		S989	I1011	V1016
H58	0	0	0	0	0	0	0	0	0	1	0	0		S989Y	I1011	V1016
H59	0	0	0	0	0	0	0	1	0	0	0	0	V999L, C1001R, S1026P, K1060T	S989	I1011	V1016G
H60	0	0	0	0	12	0	0	0	0	0	0	0		S989	I1011	V1016
H61	0	0	0	0	3	0	0	0	0	0	0	0		S989	I1011	V1016
H62	0	0	0	0	3	0	0	0	0	0	0	0		S989Y	I1011	V1016
H63	0	0	0	0	6	0	0	0	0	0	0	0		S989	I1011	V1016
H64	0	0	0	0	3	0	0	0	0	0	0	0		S989	I1011	V1016
H65	0	0	0	0	8	0	0	0	0	0	0	0	N1065D	S989	I1011	V1016
H66	0	0	0	0	3	0	0	0	0	0	0	0		S989	I1011	V1016
H67	0	0	0	0	4	0	0	0	0	0	0	0		S989	I1011	V1016
H68	0	0	0	0	5	0	0	0	0	0	0	0	N1065H	S989	I1011	V1016
H69	0	0	0	0	4	0	0	0	0	0	0	0	I1063M	S989	I1011	V1016
H70	0	0	0	0	2	0	0	0	0	0	0	0	W1058C	S989	I1011	V1016
H71	0	0	2	0	0	0	0	0	0	0	0	0	N1065H	S989	I1011	V1016
H72	0	0	5	0	0	0	0	0	0	0	0	0		S989	I1011	V1016
H73	0	0	2	0	0	0	0	0	0	0	0	0		S989	I1011	V1016
H74	0	1	0	0	0	0	0	0	0	0	0	0	E985K, W986R, D992N, V996A, D998N, V999L, V1010L, G1012E	S989P	I1011	V1016
	57	46	42	38	308	34	61	21	49	45	31	39

## Sheet: C-Domain III
													Haplotype*
	CG	TU	TS	FR	MC	GA	IA	IT	IF	IO	IM	IC	Non Syn Mut	1534
N.inds	39	21	28	22	183	28	27	27	36	18	30	17
N.Haplotype	37	48	54	29	27	45	50	31	36	40	43	36
H01	4	0	0	0	0	0	0	0	0	0	0	0		F1534S
H02	4	0	0	0	0	0	0	0	0	0	0	0	Y1523S	F1534S
H03	3	0	0	0	0	0	0	0	0	0	0	0		F1534S
H04	7	0	0	0	0	0	0	0	0	0	0	0		F1534S
H05	5	0	0	0	0	0	0	0	0	0	0	0		F1534S
H06	3	0	0	0	0	0	0	0	0	0	0	0	Y1523S	F1534S
H07	1	0	0	0	3	0	0	0	0	0	0	0		F1534L
H08	2	0	0	0	0	0	0	0	0	0	0	0		F1534S
H09	2	0	0	0	10	1	0	0	0	0	0	0		F1534
H10	2	0	0	0	0	21	0	0	0	0	0	0		F1534C
H11	1	14	20	5	94	6	25	12	16	13	14	10		F1534
H12	1	0	0	0	0	0	0	0	0	0	0	0		F1534C
H13	1	15	15	0	54	6	2	5	0	0	1	2		F1535
H14	1	0	0	0	0	0	0	0	0	0	0	0		F1534W
H15	0	1	0	3	9	0	0	0	0	0	0	0		F1535
H16	0	0	0	7	0	0	0	0	0	0	0	0	I1532F	F1535
H17	0	0	0	4	0	0	0	0	0	0	0	0	I1532F	F1535
H18	0	0	1	2	1	1	0	0	0	1	0	2		F1535
H19	0	10	9	1	19	1	2	4	3	3	7	3		F1535
H20	0	0	2	1	3	0	0	0	0	0	0	0		F1535
H21	0	0	0	1	10	0	0	0	0	0	0	0		F1535
H22	0	0	0	3	0	0	0	0	0	0	0	0	I1532F	F1535
H23	0	0	1	1	10	0	0	3	1	2	2	0		F1535
H24	0	0	0	1	0	0	0	0	1	0	0	3		F1535
H25	0	1	1	0	8	1	1	1	3	1	5	0		F1535
H26	0	0	0	0	0	3	0	0	0	0	0	0		F1535
H27	0	0	0	0	0	4	0	0	0	0	0	0		F1535
H28	0	0	4	0	46	1	19	5	3	6	3	4		F1535
H29	0	0	0	0	2	0	1	0	0	0	0	0	F1530L	F1535
H30	0	0	0	0	0	0	0	0	0	1	0	6		F1535
H31	0	0	0	0	0	0	0	1	0	1	0	4		F1535
H32	0	0	0	0	0	0	0	0	7	11	5	2	I1532T	F1535
H33	0	3	1	0	5	0	0	0	2	0	0	0		F1535
H34	0	0	0	0	9	0	0	0	0	1	1	0		F1535
H35	0	0	0	0	1	0	0	0	0	0	3	0	L1562Q	F1535
H36	0	0	0	0	3	0	0	0	0	0	2	0	L1562Q	F1535
H37	0	0	0	0	8	0	0	0	0	0	0	0	Y1523S	F1535
H38	0	0	0	0	2	0	0	0	0	0	0	0	Q1554R, K1556R	F1535
H39	0	0	0	0	2	0	0	0	0	0	0	0	L1526V, D1549N, K1555R	F1535
H40	0	0	0	0	2	0	0	0	0	0	0	0	S1536W	F1534L
H41	0	4	0	0	1	0	0	0	0	0	0	0		F1535
H42	0	0	0	0	1	0	0	0	0	0	0	0	M1524R	F1534L
H43	0	0	0	0	6	0	0	0	0	0	0	0	Y1523S	F1535
H44	0	0	0	0	1	0	0	0	0	0	0	0	M1524R, S1536W	F1534L
H45	0	0	0	0	3	0	0	0	0	0	0	0	F1528L, F1543L	F1535
	37	48	54	29	313	45	50	31	36	40	43	36
